# Supplementary material for: Growth kinetics of the adsorbed layer of poly(2-vinylpyridine) – an indirect observation of desorption of polymers from substrates
Source: Royal Society of Chemistry journal article supplement (doi:10.1039/d3sm00129f), 2023-01-01
Supplement: d3sm00129f1.pdf [file d3sm00129f1.pdf]

## Supporting Information

Growth Kinetics of the Adsorbed Layer of Poly(2-vinylpyridine) – An indirect observation of desorption of polymers from substrates.

*Marcel Gawek, Hassan Omar, Paulina Szymoniak, and Andreas Schönhals\**

Bundesanstalt für Materialforschung und –prüfung (BAM),  
Unter den Eichen 87, 12205 Berlin (Germany)

\*CORRESPONDING AUTHOR: A. Schönhals, BAM Bundesanstalt für Materialforschung und -prüfung (Fachbereich 6.6), Unter den Eichen 87, 12205 Berlin, Germany; Tel. +49 30 / 8104-3384; Fax: +49 30 / 8104-1617; Email: [Andreas.Schoenhals@bam.de](mailto:Andreas.Schoenhals@bam.de)

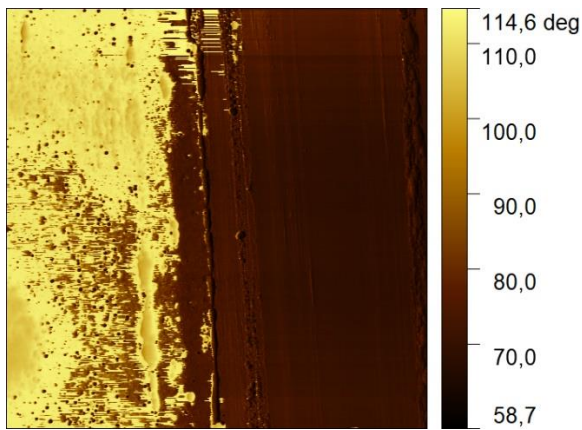

Figure S1: AFM phase contrast image for the adsorbed layer of P2VP solvent leached from a ca. 200 nm thick film which was annealed at 413 K (140 °C,  $T_g+42$  K) for 336 h.

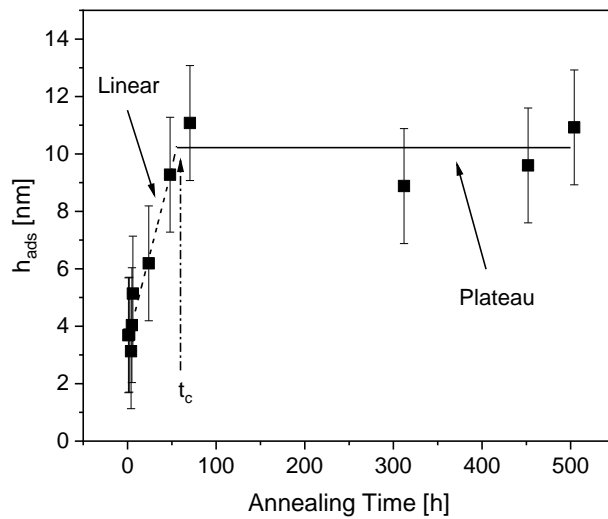

Figure S2: Time dependence of the thickness of the adsorbed layer for the annealing temperature of 383 K (110 °C,  $T_g+12$  K). The dashed line is a fit of the initial states of the growth kinetics with a power law  $\sim \left(\frac{t}{t_{growth}}\right)^\sigma$  as described in the manuscript with  $\sigma=1\pm 0.001$  and  $t_{growth}=(8.34\pm 0.2)$  h. The solid line is a guide for the eyes. The dashed-dotted arrow indicates how  $t_c$  was estimated.

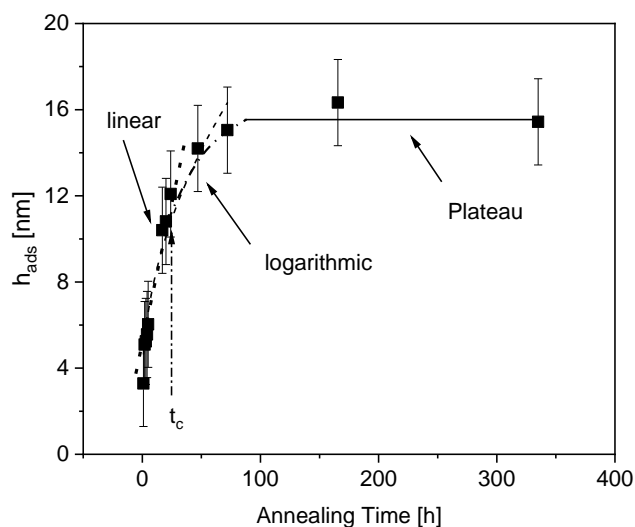

Figure S3a: Time dependence of the thickness of the adsorbed layer for the annealing temperature of 403 K (130 °C,  $T_g+32$  K). The dashed line is a fit of the initial states of the growth kinetics with a power law  $\sim (\frac{t}{t_{\text{growth}}})^\sigma$  as described in the manuscript with  $\sigma=0.49\pm 0.0503$  and  $t_{\text{growth}}=(0.367\pm 0.17)$  h. The dotted line indicates the linear growth regime. The solid line is a guide for the eyes. The dashed-dotted arrow indicates how  $t_c$  was estimated.

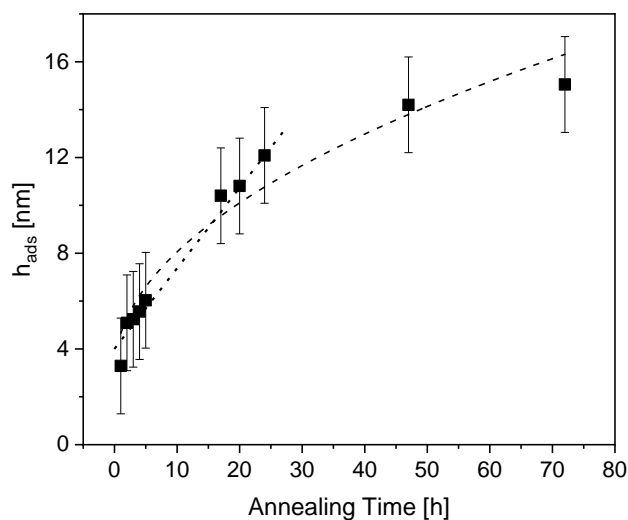

Figure S3b: Time dependence of the thickness of the adsorbed layer for the annealing temperature of the data given in Figure S3a in the time range from 0 to 80 h. The dashed line is a fit of the initial states of the growth kinetics with a power law  $\sim (\frac{t}{t_{\text{growth}}})^\sigma$  as described in the manuscript with  $\sigma=0.49\pm 0.0503$  and  $t_{\text{growth}}=(0.367\pm 0.17)$  h. The dotted line indicates the linear growth regime.

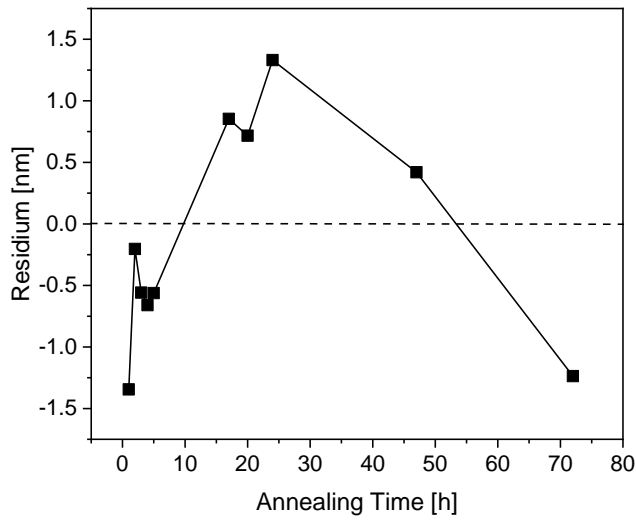

Figure S3c: Residual plot for the power law fit given in Figure S3b.

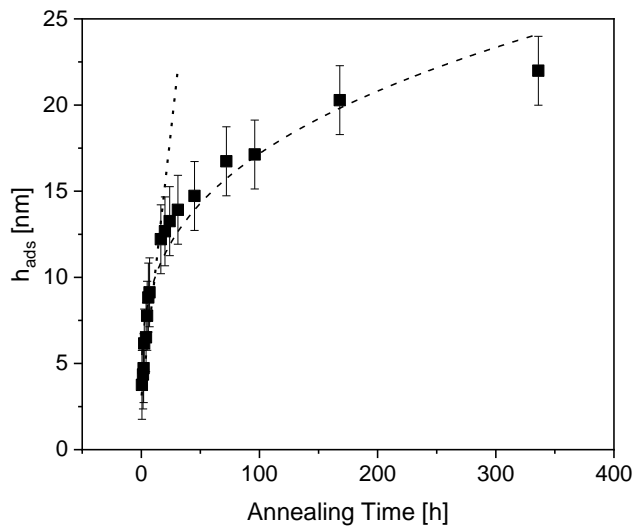

Figure S4a: Time dependence of the thickness of the adsorbed layer for the annealing temperature of 413 K (140 °C,  $T_g+42$  K). The dashed line is a fit of the initial states of the growth kinetics with a power law  $\sim(\frac{t}{t_{growth}})^\sigma$  as described in the manuscript with  $\sigma=0.328\pm 0.0185$  and  $t_{growth}=(0.0311\pm 0.0185)$  h. The dotted line indicates the linear growth regime. The solid line is a guide for the eyes.

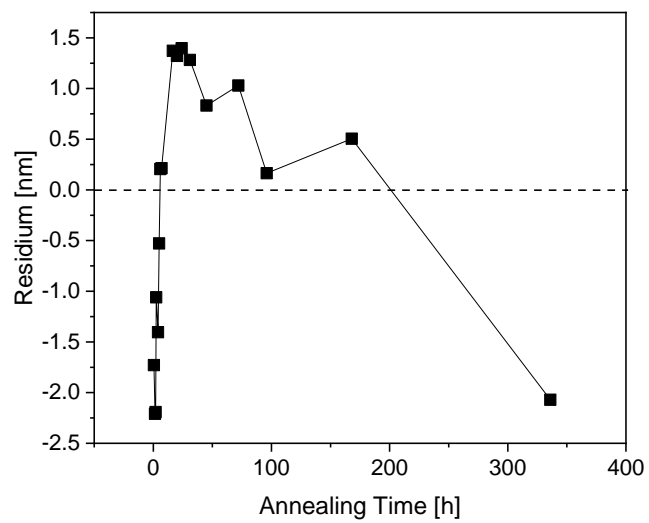

Figure S4b: Residual plot for the power law fit given in Figure S3a.

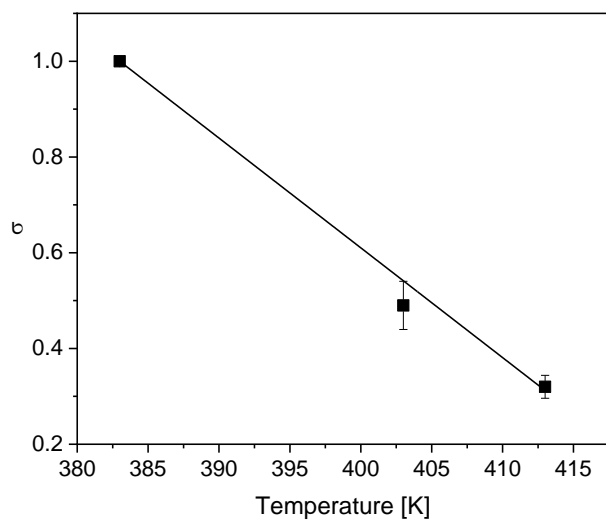

Figure S5: Power exponent  $\sigma$  versus temperature. The line is a linear regression to the data.
